# Supplementary material for: Unraveling the relationships between chemical bonding and thermoelectric properties: n-type ABO3 perovskites
Source: Royal Society of Chemistry journal article supplement (doi:10.1039/d2ta01624a), 2022-01-01
Supplement: d2ta01624a1.pdf [file d2ta01624a1.pdf]

## Unraveling the relationships between chemical bonding and thermoelectric properties: n-type $ABO_3$ perovskites

Yan Cao<sup>a</sup>, Zhenyu Zhu<sup>a</sup>, Xin Li<sup>b</sup>, Jinyang Xi<sup>a,c</sup>, David J. Singh<sup>d</sup>, Lili Xi<sup>\*a,c</sup>, Jiong Yang<sup>\*a,c</sup>, and Wenqing Zhang<sup>e</sup>

<sup>a</sup> Materials Genome Institute, Shanghai University, Shanghai 200444, China.

<sup>b</sup> State Key Laboratory of Functional Materials for Informatics, Shanghai Institute of Microsystem and Information Technology, Chinese Academy of Sciences, Shanghai 200050, China.

<sup>c</sup> Zhejiang Laboratory, Hangzhou, Zhejiang 311100, China

<sup>d</sup> Department of Physics and Astronomy, University of Missouri, Columbia, MO 65211, USA.

<sup>e</sup> Department of Materials Science and Engineering and Shenzhen Institute for Quantum Science & Technology, Southern University of Science and Technology, Shenzhen, Guangdong 518055, China

Corresponding authors:

Jiong Yang, Email: [jiongy@t.shu.edu.cn](mailto:jiongy@t.shu.edu.cn)

Lili Xi, Email: [lilyxi@t.shu.edu.cn](mailto:lilyxi@t.shu.edu.cn)

**Table S1.** The lattice parameter, band gaps ( $E_g$ ), density of states (DOS) at conduction band minima (CBM) +0.1 eV, deformation potential  $E_{\text{def}}$  (eV), and the coefficient of determination  $R^2$  of the 46 compounds.

|   | Composition        | Lattice Parameter (Å) | $E_g$ (eV) | DOS (a.u.) | $E_{\text{def}}$ (eV) | $R^2$ |
|---|--------------------|-----------------------|------------|------------|-----------------------|-------|
| 1 | SrHfO <sub>3</sub> | 4.14                  | 5.22       | 0.27       | 1.55                  | 1.00  |
| 2 | EuHfO <sub>3</sub> | 4.09                  | 5.33       | 0.24       | 2.96                  | 1.00  |
| 3 | CaZrO <sub>3</sub> | 4.14                  | 4.28       | 0.33       | 4.36                  | 1.00  |
| 4 | SrZrO <sub>3</sub> | 4.18                  | 4.29       | 0.38       | 43.83                 | 0.23  |
| 5 | EuZrO <sub>3</sub> | 4.13                  | 4.40       | 0.34       | 4.30                  | 1.00  |
| 6 | KTaO <sub>3</sub>  | 4.04                  | 3.69       | 0.52       | 2.29                  | 1.00  |
| 7 | NaTaO <sub>3</sub> | 3.99                  | 4.00       | 0.55       | 2.06                  | 0.94  |
| 8 | RbTaO <sub>3</sub> | 4.08                  | 3.48       | 0.52       | 2.61                  | 0.95  |

|    |                    |      |      |      |        |      |
|----|--------------------|------|------|------|--------|------|
| 9  | TiTaO <sub>3</sub> | 4.09 | 1.50 | 0.68 | 0.85   | 0.25 |
| 10 | AgNbO <sub>3</sub> | 4.00 | 2.50 | 0.58 | 6.14   | 0.7  |
| 11 | NaNbO <sub>3</sub> | 3.98 | 2.73 | 0.56 | 2.30   | 0.99 |
| 12 | KNbO <sub>3</sub>  | 4.03 | 2.50 | 0.56 | -0.11  | 0    |
| 13 | TiNbO <sub>3</sub> | 4.09 | 0.42 | 0.67 | 62.49  | 0.32 |
| 14 | SrTiO <sub>3</sub> | 3.97 | 3.13 | 0.82 | 9.08   | 0.62 |
| 15 | SnTiO <sub>3</sub> | 3.97 | 1.82 | 1.04 | 1.99   | 1.00 |
| 16 | PbTiO <sub>3</sub> | 4.00 | 2.64 | 1.17 | 1.74   | 0.99 |
| 17 | CaTiO <sub>3</sub> | 3.92 | 3.26 | 0.73 | 2.50   | 1.00 |
| 18 | EuTiO <sub>3</sub> | 3.91 | 3.31 | 0.69 | 2.67   | 0.04 |
| 19 | YbTiO <sub>3</sub> | 3.88 | 3.43 | 0.72 | 2.65   | 1.00 |
| 20 | PbHfO <sub>3</sub> | 4.15 | 3.58 | 0.1  | 2.01   | 1.00 |
| 21 | PbZrO <sub>3</sub> | 4.19 | 3.54 | 0.1  | 3.29   | 0.93 |
| 22 | BiAlO <sub>3</sub> | 3.79 | 2.63 | 0.05 | -1.07  | 0.93 |
| 23 | BiGaO <sub>3</sub> | 3.85 | 2.46 | 0.05 | -0.92  | 0.92 |
| 24 | BiInO <sub>3</sub> | 4.15 | 1.05 | 0.08 | -0.73  | 0.57 |
| 25 | BiScO <sub>3</sub> | 4.11 | 1.43 | 0.06 | 3.37   | 1.00 |
| 26 | EuGeO <sub>3</sub> | 3.77 | 2.90 | 0.02 | -10.66 | 1.00 |
| 27 | PbGeO <sub>3</sub> | 3.90 | 0.84 | 0.02 | -9.28  | 1.00 |
| 28 | SrGeO <sub>3</sub> | 3.86 | 1.92 | 0.02 | -9.84  | 1.00 |
| 29 | YbGeO <sub>3</sub> | 3.74 | 3.39 | 0.02 | -11.15 | 1.00 |
| 30 | CaSiO <sub>3</sub> | 3.61 | 4.74 | 0.02 | -12.29 | 1.00 |
| 31 | SnSiO <sub>3</sub> | 3.70 | 1.09 | 0.02 | -11.71 | 1.00 |
| 32 | SrSiO <sub>3</sub> | 3.69 | 3.68 | 0.02 | -11.36 | 1.00 |

|    |                    |      |      |      |        |      |
|----|--------------------|------|------|------|--------|------|
| 33 | EuSiO <sub>3</sub> | 3.61 | 4.69 | 0.02 | -22.49 | 1.00 |
| 34 | PbSiO <sub>3</sub> | 3.75 | 1.83 | 0.02 | -20.38 | 1.00 |
| 35 | CaSnO <sub>3</sub> | 3.99 | 4.32 | 0.03 | -8.27  | 0.88 |
| 36 | EuSnO <sub>3</sub> | 3.98 | 4.57 | 0.02 | -13.97 | 1.00 |
| 37 | PbSnO <sub>3</sub> | 4.06 | 3.64 | 0.03 | -12.69 | 1.00 |
| 38 | SrSnO <sub>3</sub> | 4.04 | 3.80 | 0.02 | -10.62 | 1.00 |
| 39 | BaSnO <sub>3</sub> | 4.13 | 0.94 | 0.01 | -9.33  | 1.00 |
| 40 | NdGaO <sub>3</sub> | 3.83 | 4.06 | 0.09 | 3.32   | 1.00 |
| 41 | PrGaO <sub>3</sub> | 3.84 | 4.03 | 0.09 | 3.29   | 1.00 |
| 42 | SmGaO <sub>3</sub> | 3.80 | 4.20 | 0.09 | 3.34   | 1.00 |
| 43 | DyAlO <sub>3</sub> | 3.71 | 4.61 | 0.09 | 0.011  | 0.01 |
| 44 | NdAlO <sub>3</sub> | 3.77 | 4.13 | 0.08 | 3.31   | 1.00 |
| 45 | PrAlO <sub>3</sub> | 3.80 | 4.09 | 0.08 | 3.23   | 1.00 |
| 46 | LaAlO <sub>3</sub> | 3.83 | 3.12 | 0.07 | 2.91   | 1.00 |

**Table S2.** The Young's modulus ( $G$ ), lattice thermal conductivity ( $\kappa_L$ ),  $ZT_{max}$ , carrier concentrations  $n$ , electrical conductivity ( $\sigma$ ), and Seebeck coefficients ( $S$ ) of the 46 compounds at 700 K.

| Composition        | Young's modulus $G$ (GPa) | $\kappa_L$ (W/mK) | $ZT_{max}$ | $n$ ( $10^{20}$ cm <sup>-3</sup> ) | $\sigma$ (S/m) | $S$ ( $\mu$ V/K) |
|--------------------|---------------------------|-------------------|------------|------------------------------------|----------------|------------------|
| SrHfO <sub>3</sub> | 250.59                    | 13.28             | 0.37       | 2.45                               | 233428.91      | -191.72          |
| EuHfO <sub>3</sub> | 256.83                    | 13.43             | 0.36       | 2.30                               | 233753.64      | -191.84          |
| CaZrO <sub>3</sub> | 213.69                    | 11.53             | 0.32       | 3.26                               | 184653.90      | -187.40          |
| SrZrO <sub>3</sub> | 226.04                    | 13.34             | 0.38       | 3.39                               | 249419.19      | -191.77          |

|                    |        |       |      |      |           |         |
|--------------------|--------|-------|------|------|-----------|---------|
| EuZrO <sub>3</sub> | 230.62 | 11.07 | 0.46 | 2.81 | 232863.31 | -199.79 |
| KTaO <sub>3</sub>  | 302.16 | 21.31 | 0.52 | 4.30 | 474028.37 | -205.73 |
| NaTaO <sub>3</sub> | 281.84 | 15.21 | 0.72 | 3.89 | 416043.56 | -222.03 |
| RbTaO <sub>3</sub> | 297.99 | 26.44 | 0.42 | 4.66 | 504262.48 | -196.76 |
| TlTaO <sub>3</sub> | 267.20 | 11.03 | 0.78 | 3.87 | 306974.73 | -227.34 |
| AgNbO <sub>3</sub> | 215.81 | 6.66  | 0.96 | 3.29 | 220389.72 | -237.10 |
| NaNbO <sub>3</sub> | 262.49 | 16.53 | 0.70 | 3.89 | 432490.82 | -222.24 |
| KNbO <sub>3</sub>  | 281.84 | 23.04 | 0.52 | 4.35 | 487882.69 | -209.40 |
| TiNbO <sub>3</sub> | 244.68 | 10.43 | 0.83 | 3.65 | 304976.31 | -230.39 |
| SrTiO <sub>3</sub> | 270.33 | 18.58 | 0.40 | 7.54 | 334971.79 | -196.83 |
| SnTiO <sub>3</sub> | 222.31 | 9.02  | 0.65 | 6.75 | 217452.55 | -219.94 |
| PbTiO <sub>3</sub> | 233.33 | 9.34  | 0.69 | 6.93 | 232877.94 | -221.82 |
| CaTiO <sub>3</sub> | 259.84 | 19.39 | 0.32 | 7.87 | 297336.90 | -187.73 |
| EuTiO <sub>3</sub> | 289.89 | 20.86 | 0.39 | 7.12 | 381912.11 | -194.07 |
| YbTiO <sub>3</sub> | 278.52 | 16.28 | 0.50 | 6.65 | 350063.88 | -204.59 |
| PbHfO <sub>3</sub> | 223.87 | 7.92  | 0.51 | 0.77 | 176521.06 | -205.83 |
| PbZrO <sub>3</sub> | 200.75 | 7.13  | 0.48 | 0.83 | 152049.09 | -203.03 |
| BiAlO <sub>3</sub> | 290.30 | 14.44 | 0.36 | 0.59 | 253503.67 | -190.72 |
| BiGaO <sub>3</sub> | 227.24 | 8.02  | 0.46 | 0.54 | 165844.00 | -200.81 |
| BiInO <sub>3</sub> | 143.96 | 2.92  | 0.66 | 0.49 | 78634.59  | -219.06 |
| BiScO <sub>3</sub> | 367.50 | 8.57  | 0.53 | 0.45 | 195848.10 | -207.84 |
| EuGeO <sub>3</sub> | 322.84 | 23.86 | 0.01 | 0.47 | 17926.02  | -134.08 |
| PbGeO <sub>3</sub> | 245.07 | 11.14 | 0.01 | 0.38 | 9730.26   | -133.14 |
| SrGeO <sub>3</sub> | 277.07 | 23.50 | 0.01 | 0.39 | 12724.63  | -133.26 |

|                    |        |       |      |      |           |         |
|--------------------|--------|-------|------|------|-----------|---------|
| YbGeO <sub>3</sub> | 318.29 | 19.64 | 0.01 | 0.50 | 19689.00  | -135.79 |
| CaSiO <sub>3</sub> | 365.32 | 35.55 | 0.01 | 0.67 | 16186.06  | -136.68 |
| SnSiO <sub>3</sub> | 294.23 | 15.32 | 0.01 | 0.61 | 15562.07  | -134.86 |
| SrSiO <sub>3</sub> | 346.23 | 30.90 | 0.01 | 0.58 | 20534.92  | -136.00 |
| EuSiO <sub>3</sub> | 421.75 | 37.25 | 0.01 | 0.65 | 27906.13  | -137.73 |
| PbSiO <sub>3</sub> | 291.81 | 13.26 | 0.01 | 0.57 | 15410.93  | -134.50 |
| CaSnO <sub>3</sub> | 210.88 | 10.95 | 0.01 | 0.56 | 8603.92   | -136.41 |
| EuSnO <sub>3</sub> | 234.69 | 11.16 | 0.01 | 0.54 | 11894.26  | -138.11 |
| PbSnO <sub>3</sub> | 202.97 | 7.95  | 0.02 | 0.69 | 10608.51  | -133.38 |
| SrSnO <sub>3</sub> | 217.99 | 12.82 | 0.01 | 0.50 | 10821.88  | -137.12 |
| BaSnO <sub>3</sub> | 219.68 | 14.06 | 0.01 | 0.23 | 7528.25   | -135.98 |
| NdGaO <sub>3</sub> | 263.43 | 12.89 | 0.17 | 1.41 | 126406.88 | -167.56 |
| PrGaO <sub>3</sub> | 263.35 | 13.25 | 0.17 | 1.38 | 128851.64 | -167.13 |
| SmGaO <sub>3</sub> | 261.75 | 12.33 | 0.17 | 1.46 | 122732.81 | -168.79 |
| DyAlO <sub>3</sub> | 344.74 | 24.10 | 0.13 | 1.65 | 192951.90 | -162.45 |
| NdAlO <sub>3</sub> | 337.76 | 25.89 | 0.12 | 1.49 | 186751.64 | -159.42 |
| PrAlO <sub>3</sub> | 333.63 | 25.40 | 0.12 | 1.45 | 186283.27 | -159.75 |
| LaAlO <sub>3</sub> | 317.62 | 23.30 | 0.13 | 1.21 | 184365.77 | -160.28 |

Table S3. The band gaps in this work calculated with mBJ+U ( $E_{g\text{-mBJ+U}}$ ), PBE+U ( $E_{g\text{-PBE+U}}$ ), and experimental band gaps of cubic ABO<sub>3</sub> ( $E_{g\text{-exp.}}$ ).

| Compound           | $E_{g\text{-mBJ+U}}$ (eV) | $E_{g\text{-PBE+U}}$ (eV) | $E_{g\text{-exp.}}$ (eV) |
|--------------------|---------------------------|---------------------------|--------------------------|
| KTaO <sub>3</sub>  | 3.69                      | 2.33                      | 3.64 <sup>1</sup>        |
| NaTaO <sub>3</sub> | 4.00                      | 2.51                      | ~4.00 <sup>2</sup>       |
| AgNbO <sub>3</sub> | 2.50                      | 1.82                      | 2.78 <sup>3</sup>        |
| SrTiO <sub>3</sub> | 3.13                      | 2.32                      | 3.22 <sup>4</sup>        |
| PrAlO <sub>3</sub> | 4.09                      | 2.89                      | 3.19 <sup>5</sup>        |

**Fig. S1.** The electronic structures, DOS, wave functions, and band-resolved COHPs for 46 compounds.

1. SrHfO<sub>3</sub>

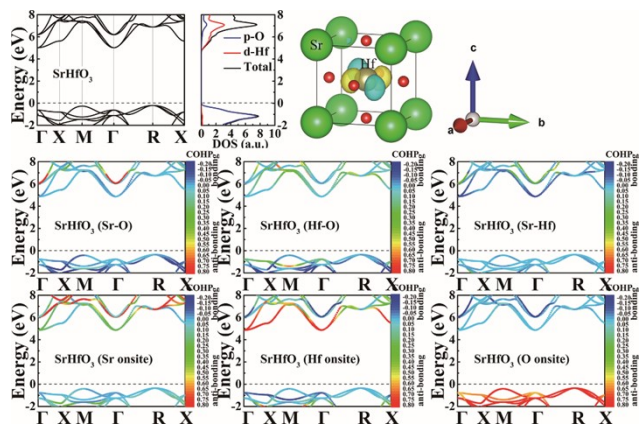

2. EuHfO<sub>3</sub>

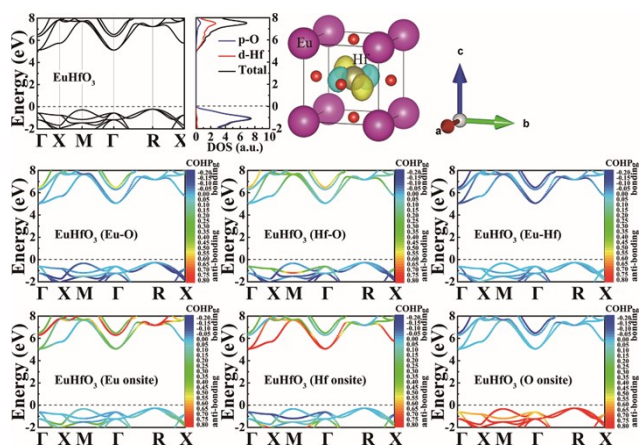

### 3. CaZrO<sub>3</sub>

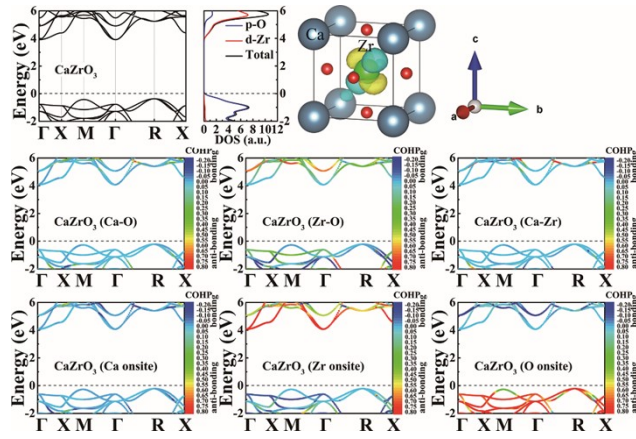

### 4. SrZrO<sub>3</sub>

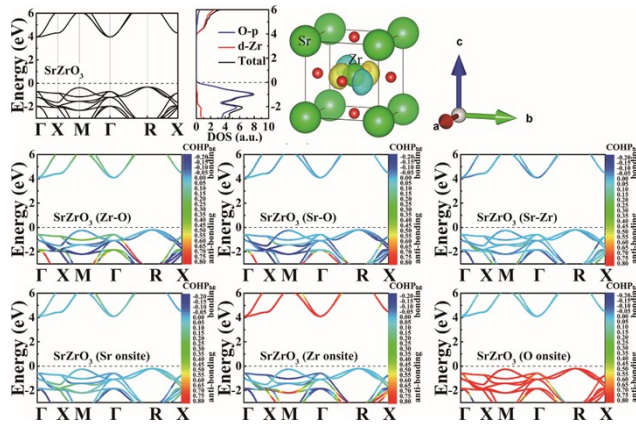

### 5. EuZrO<sub>3</sub>

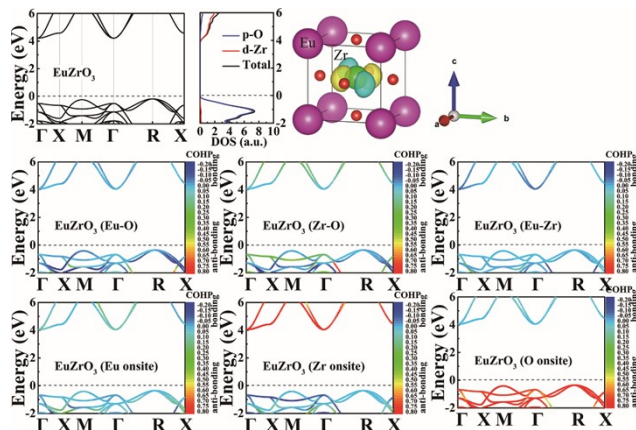

## 6. $\text{KTaO}_3$

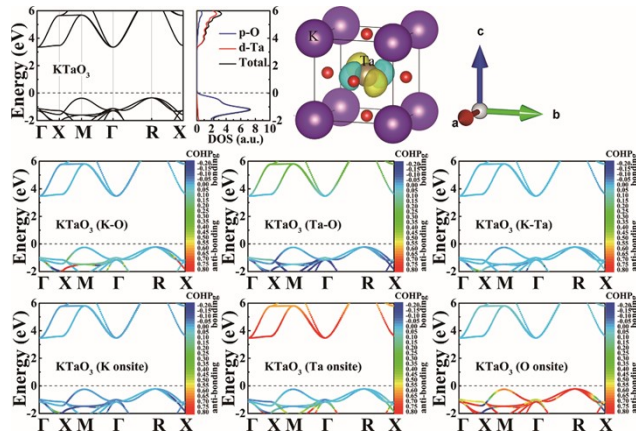

## 7. $\text{NaTaO}_3$

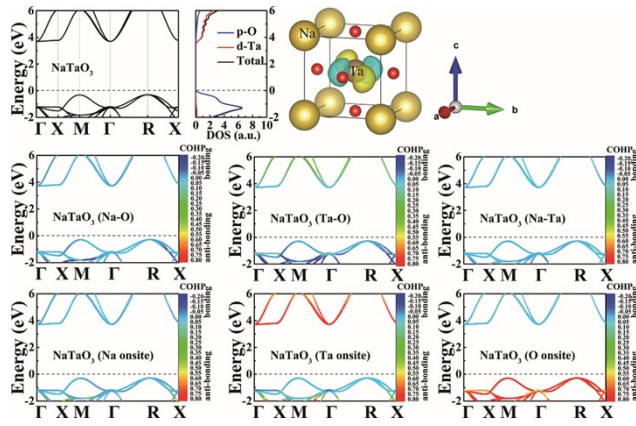

## 8. $\text{RbTaO}_3$

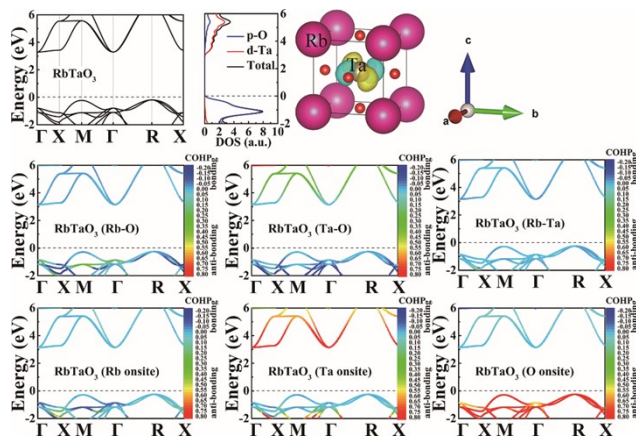



## 9. $\text{TiTaO}_3$

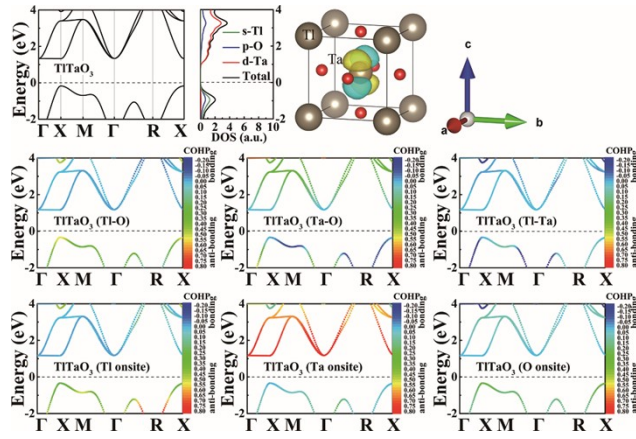

## 10. $\text{AgNbO}_3$

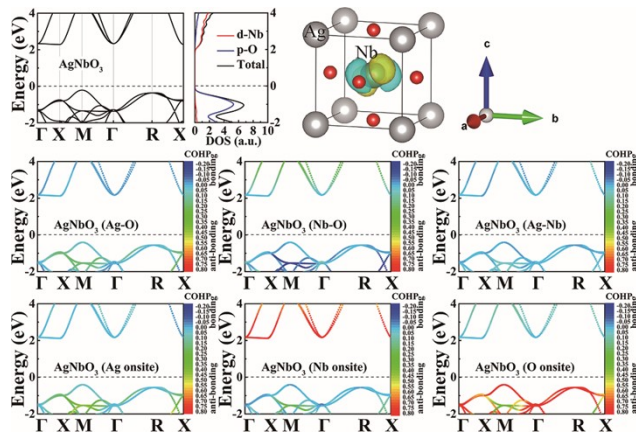

## 11. $\text{NaNbO}_3$

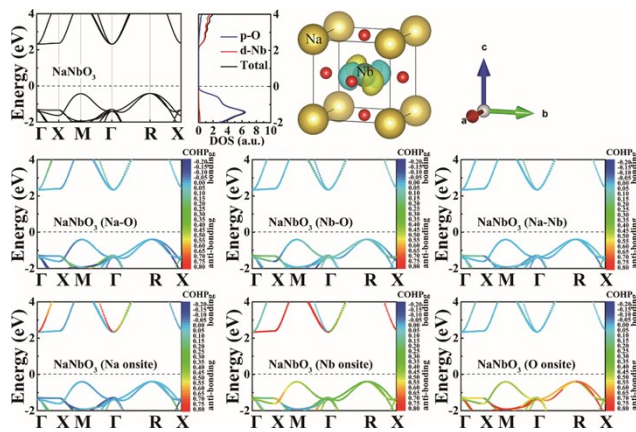

## 12. KNbO<sub>3</sub>

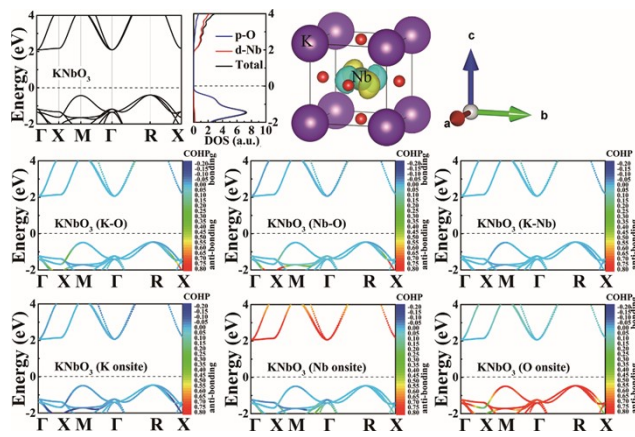

## 13. TiNbO<sub>3</sub>

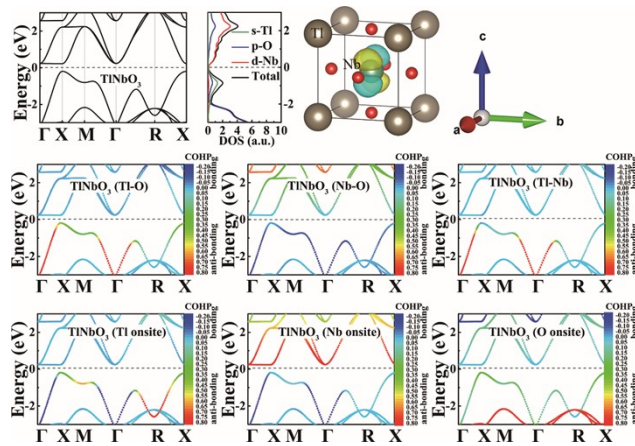

## 14. SrTiO<sub>3</sub>

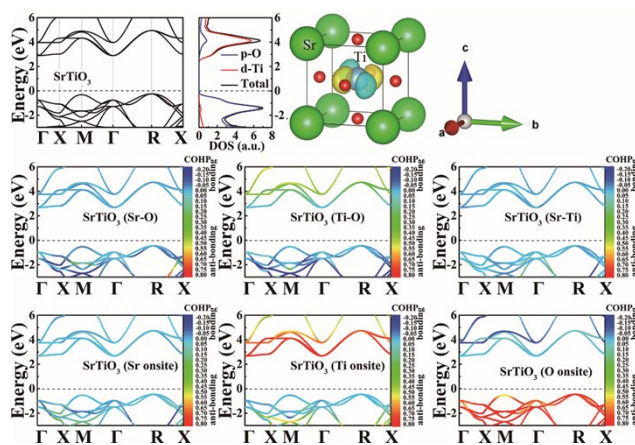

### 15. SnTiO<sub>3</sub>

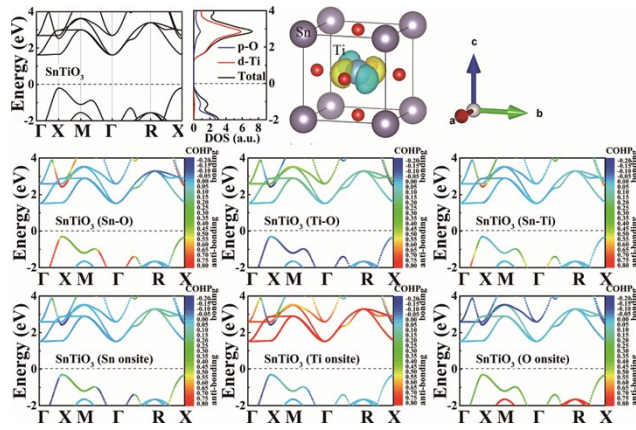

### 16. PbTiO<sub>3</sub>

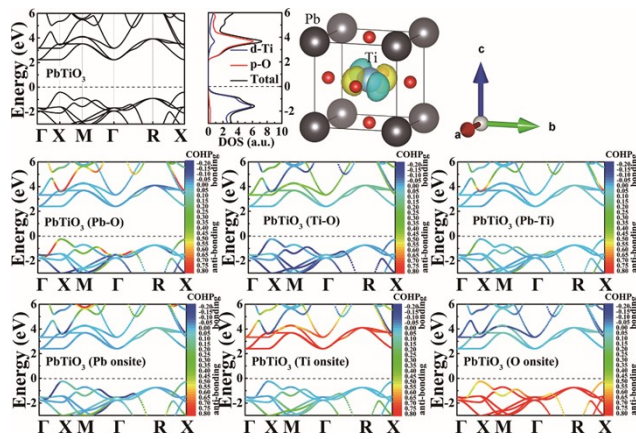

### 17. CaTiO<sub>3</sub>

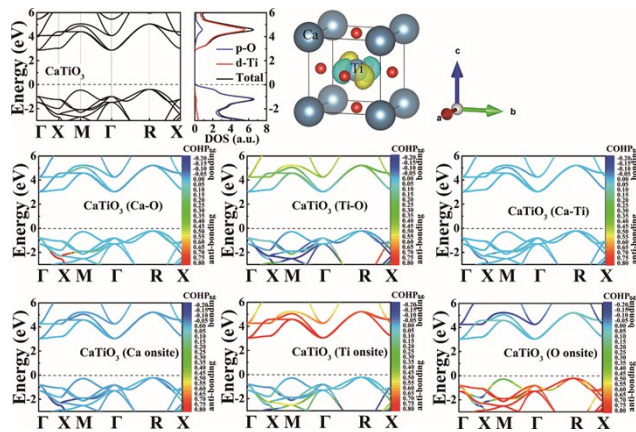



### 18. $\text{EuTiO}_3$

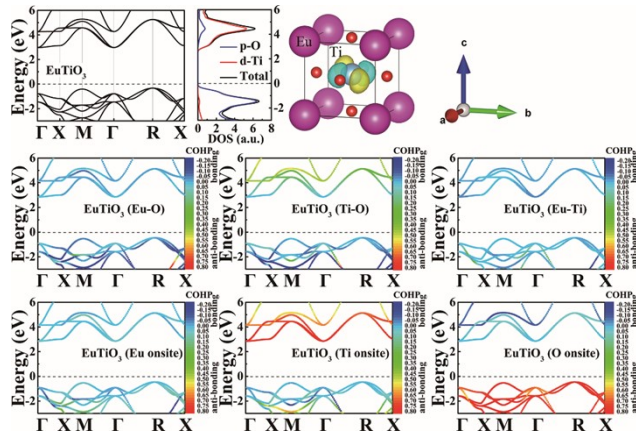

### 19. $\text{YbTiO}_3$

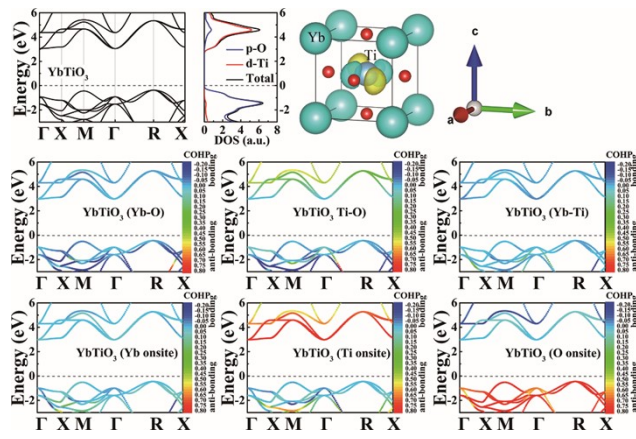

### 20. $\text{PbHfO}_3$

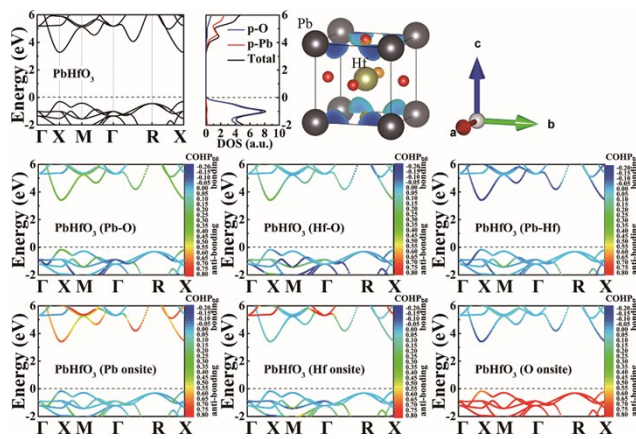

## 21. PbZrO<sub>3</sub>

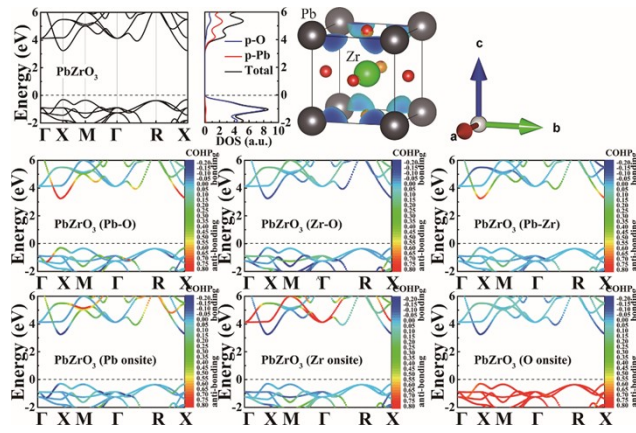

## 22. BiAlO<sub>3</sub>

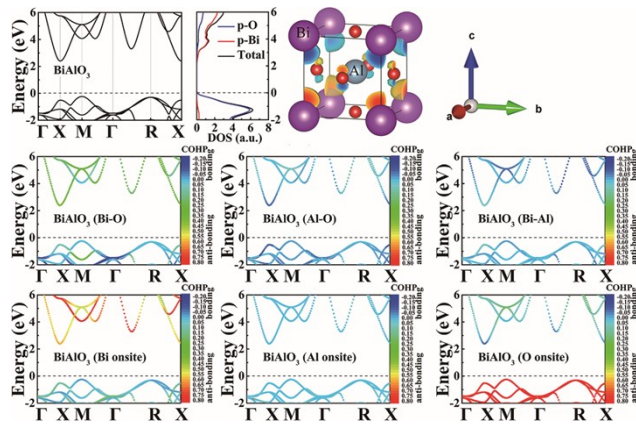

## 23. BiGaO<sub>3</sub>

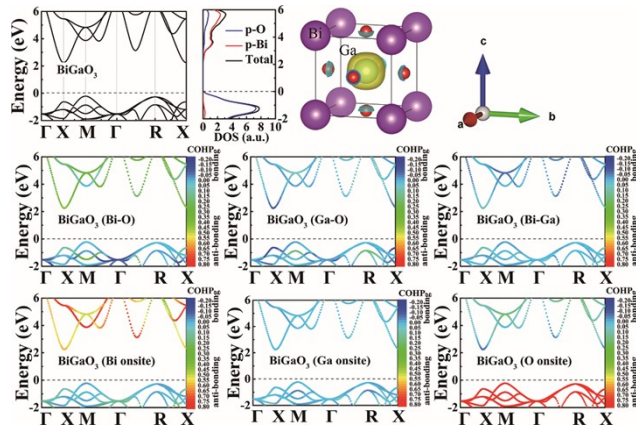

## 24. BiInO<sub>3</sub>

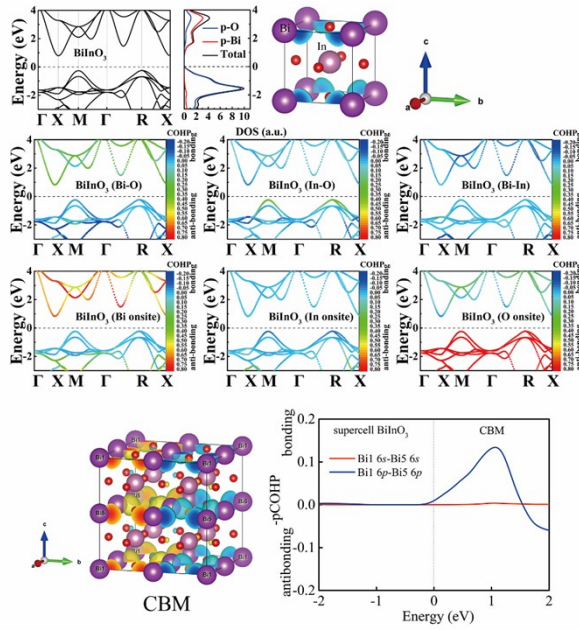

## 25. BiScO<sub>3</sub>

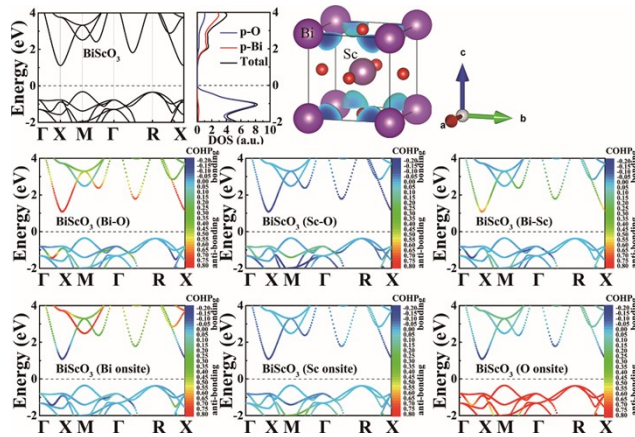

## 26. EuGeO<sub>3</sub>

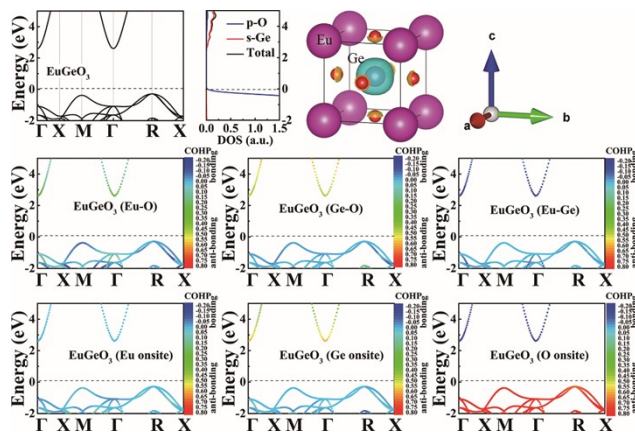



### 27. $\text{PbGeO}_3$

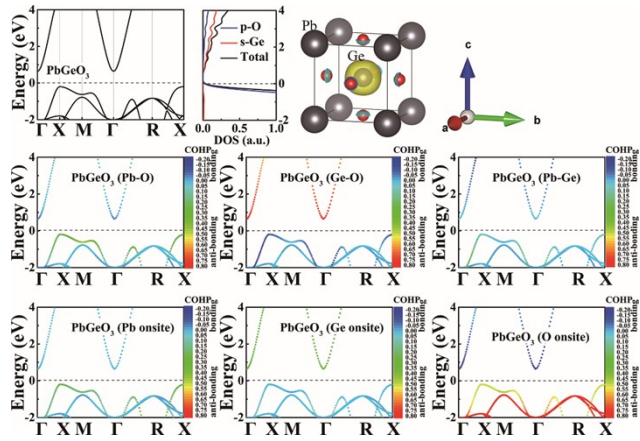

### 28. $\text{SrGeO}_3$

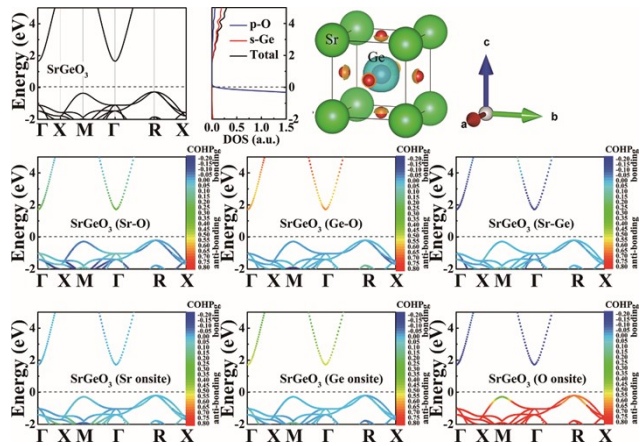

### 29. $\text{YbGeO}_3$

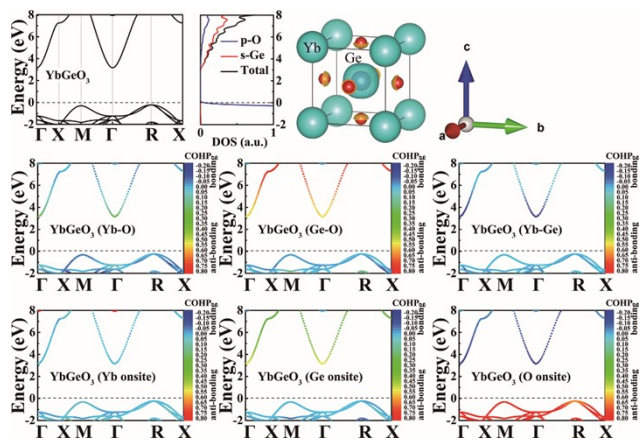

### 30. CaSiO<sub>3</sub>

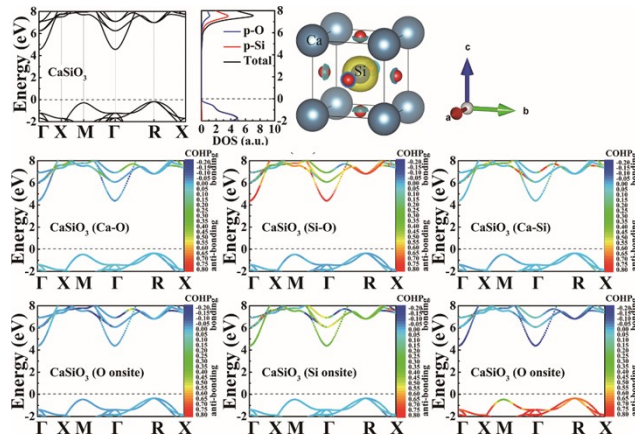

### 31. SnSiO<sub>3</sub>

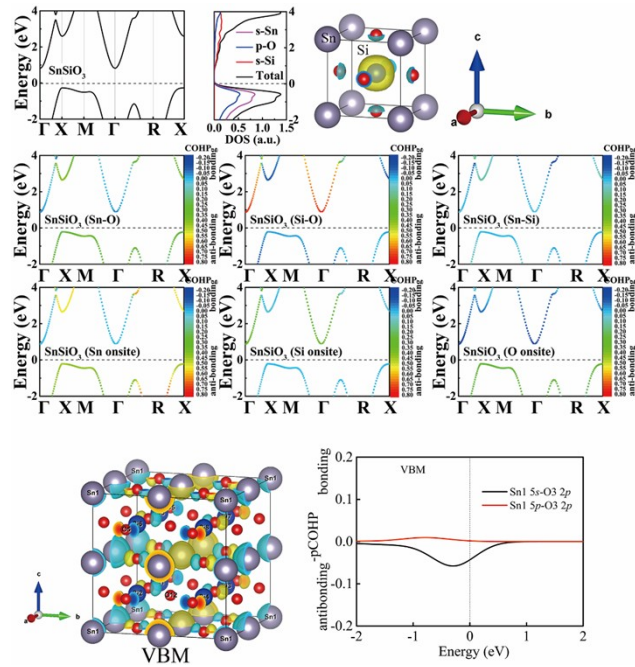

### 32. SrSiO<sub>3</sub>

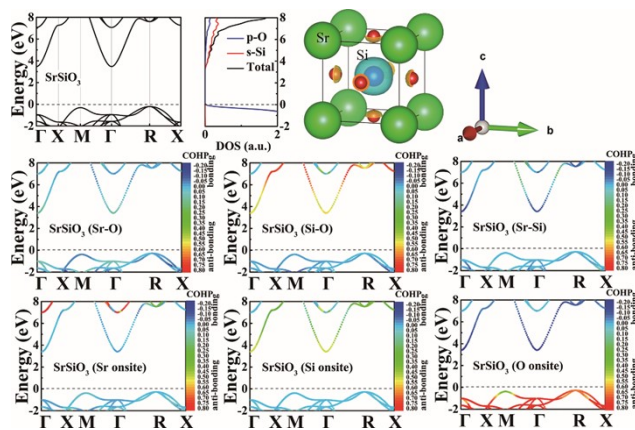



### 33. $\text{EuSiO}_3$

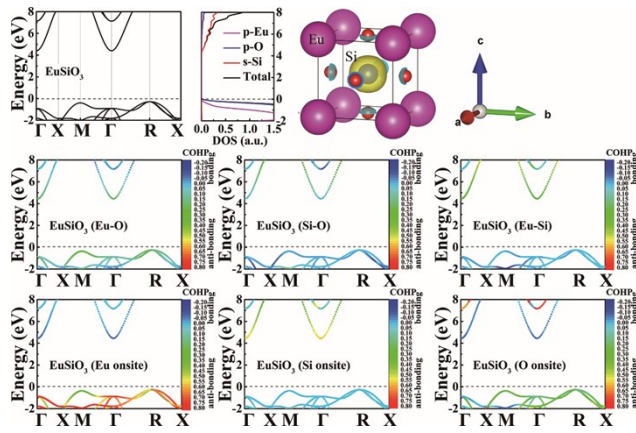

### 34. $\text{PbSiO}_3$

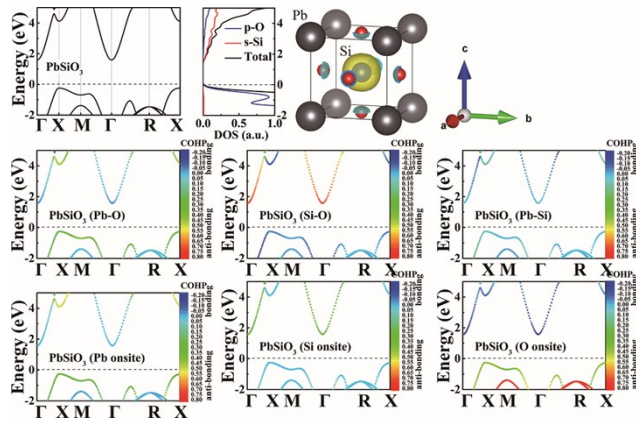

### 35. $\text{CaSnO}_3$

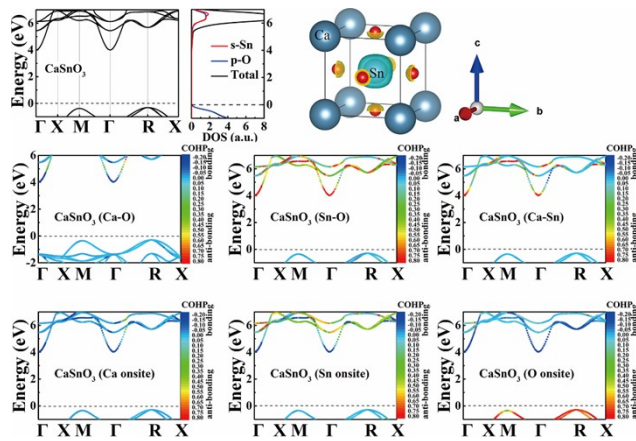

### 36. $\text{EuSnO}_3$

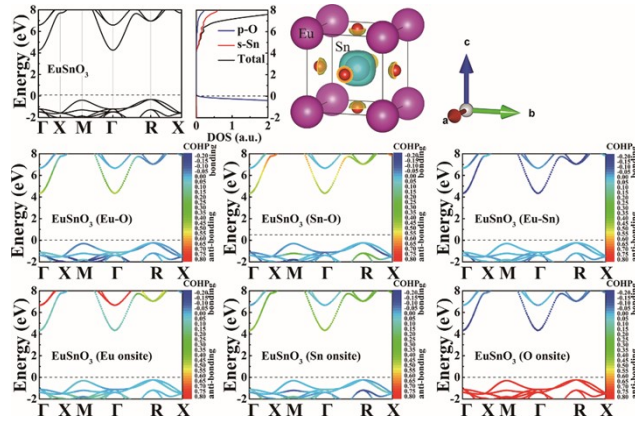

### 37. $\text{PbSnO}_3$

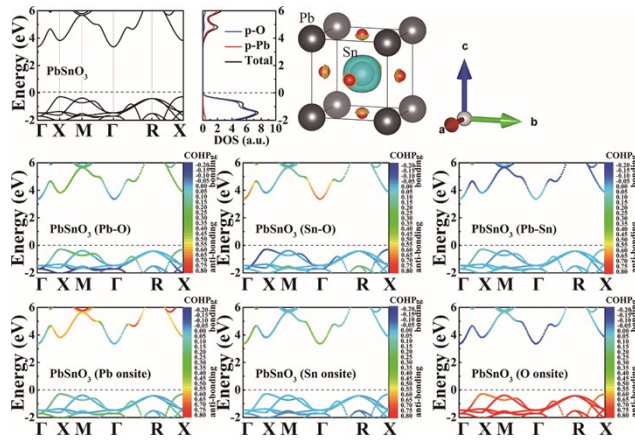

### 38. $\text{SrSnO}_3$

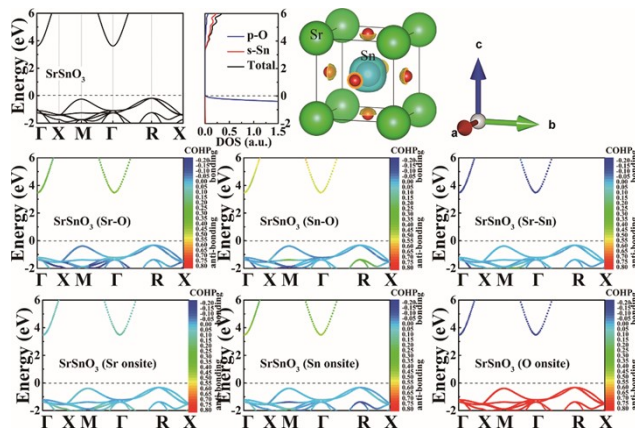

### 39. BaSnO<sub>3</sub>

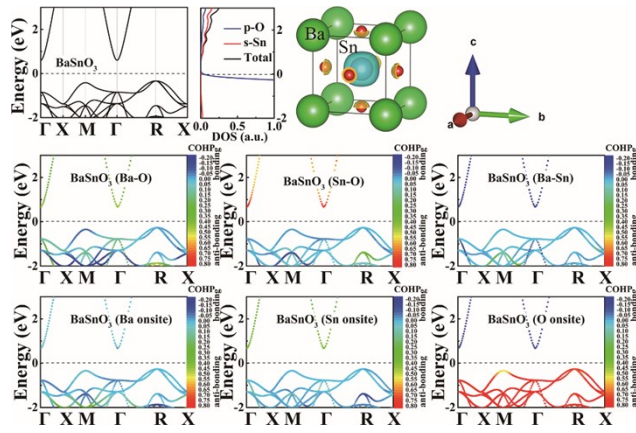

### 40. NdGaO<sub>3</sub>

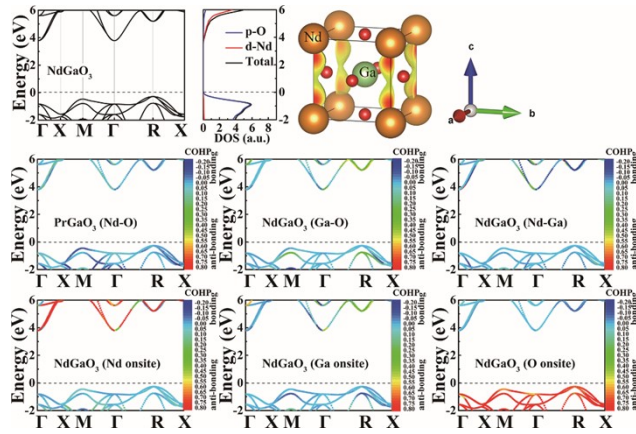

### 41. PrGaO<sub>3</sub>

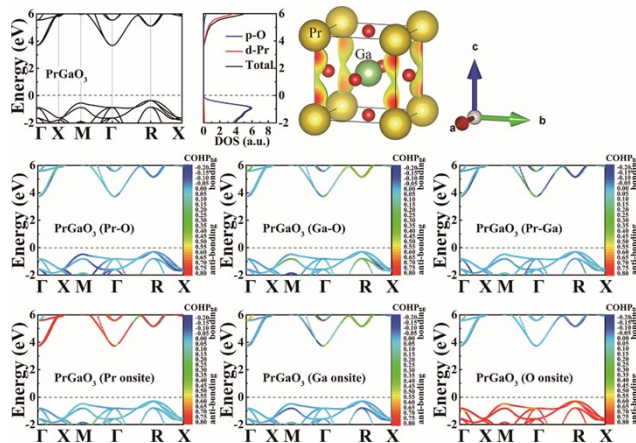

## 42. SmGaO<sub>3</sub>

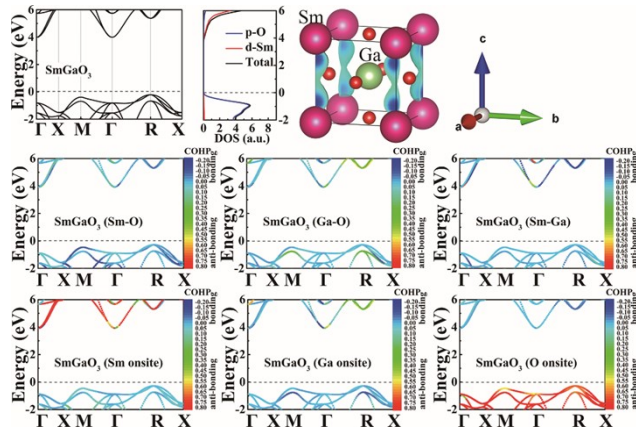

## 43. DyAlO<sub>3</sub>

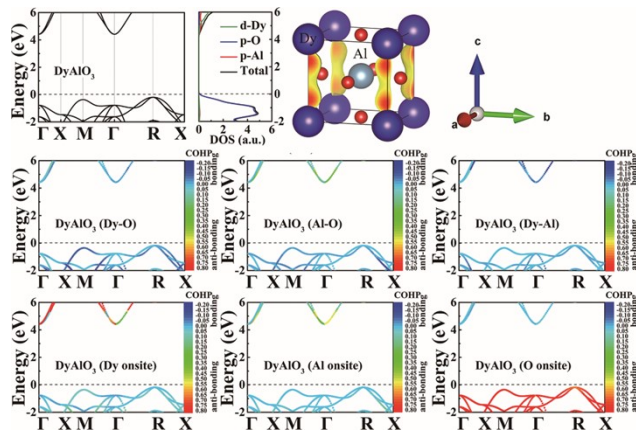

## 44. NdAlO<sub>3</sub>

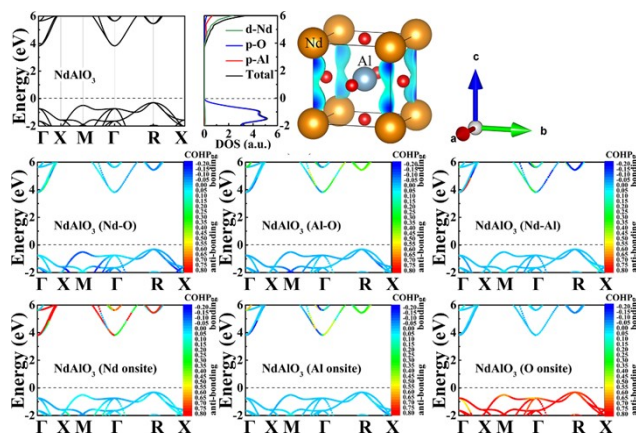



### 45. PrAlO<sub>3</sub>

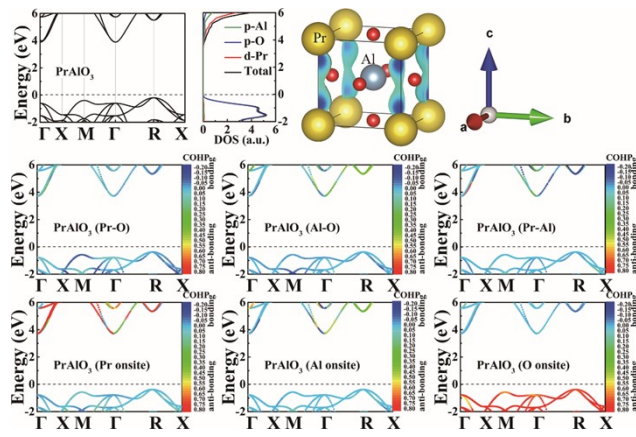

### 46. LaAlO<sub>3</sub>

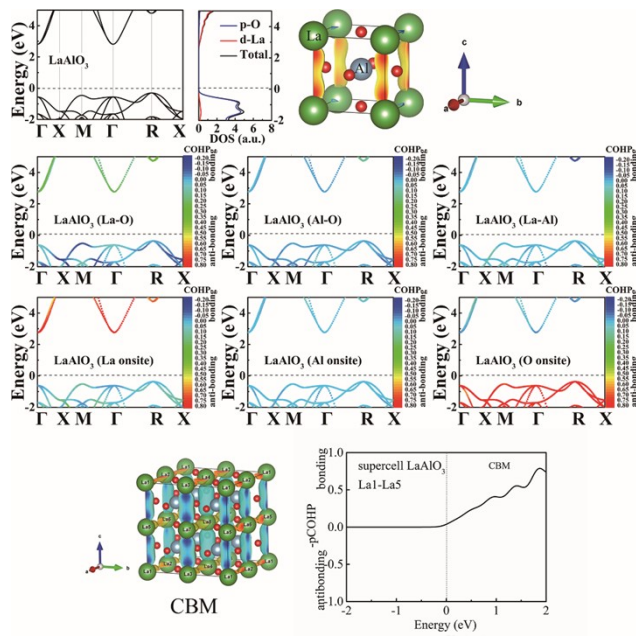

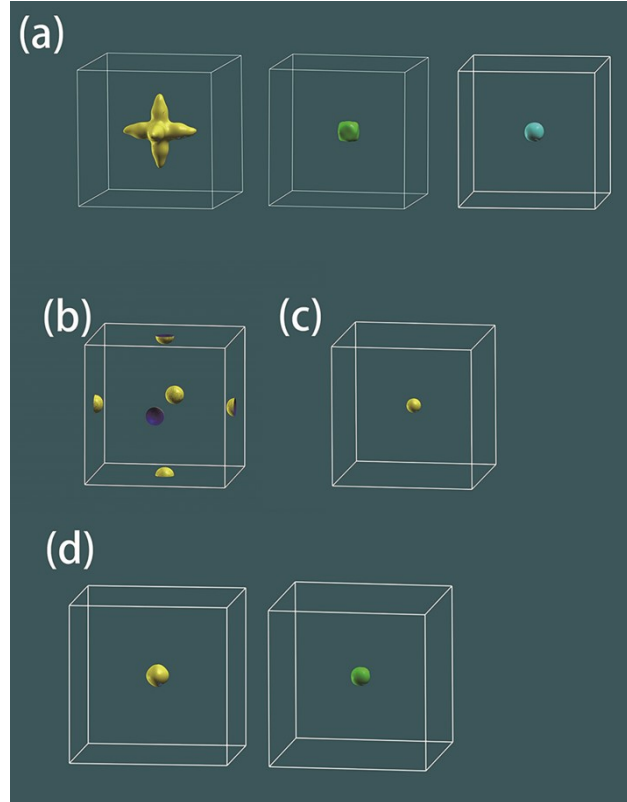

**Fig. S2** The Fermi surfaces of (a) SrTiO<sub>3</sub>, (b) BiInO<sub>3</sub>, (c) CaSnO<sub>3</sub> (d) LaAlO<sub>3</sub>.

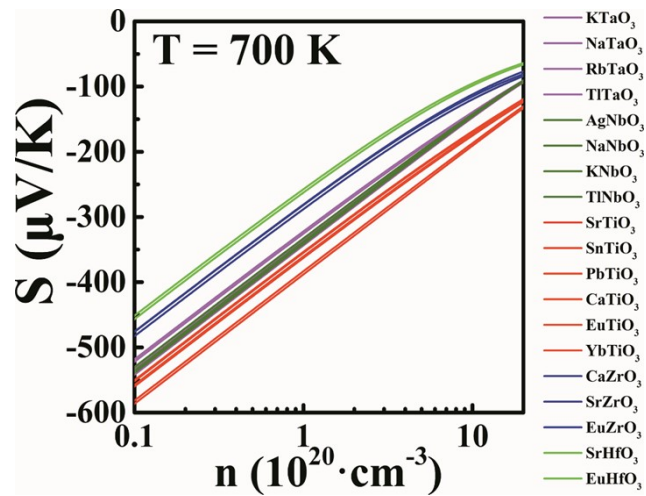

**Fig. S3** The correlations between Seebeck coefficient ( $S$ ) and carrier concentration ( $n$ ) of type I compounds.

#### References:

1. G. E. Jellison, I. Paulauskas, L. A. Boatner and D. J. Singh, Phys. Rev. B, 2006, 74, 155130
2. G. A. S. Alves, H. A. Centurion, J. R. Sambrano, M. M. Ferrer and R. V. Gonçalves,

ACS Applied Energy Materials, 2020, 4, 671-679.

3. O. A. Carrasco-Jaim, L. M. Torres-Martínez and E. Moctezuma, *Journal of Photochemistry and Photobiology A: Chemistry*, 2018, 358, 167-176.

4. M. Cardona, *Physical Review*, 1965, 140, A651-A655.

5. M. K. Butt, M. Yaseen, J. Iqbal, A. S. Altowyan, A. Murtaza, M. Iqbal and A. Laref, *Journal of Physics and Chemistry of Solids*, 2021, 154, 110084.
